# Supplementary material for: Mapping patterns of metastatic lymph nodes for postoperative radiotherapy in thoracic esophageal squamous cell carcinoma: a recommendation for clinical target volume definition
Source: PubMed Central journal article supplement (PMC6749673; doi:10.1186/s12885-019-6065-7), 2019-09-18

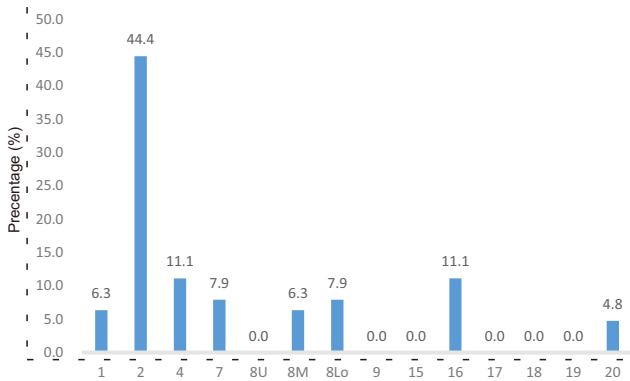

Supplement: 12885_2019_6065_MOESM2_ESM.pdf [file 12885_2019_6065_MOESM2_ESM.pdf]
